# Supplementary material
Source: MDPI journal article supplement (https://www.mdpi.com/2673-8007/1/3/30)
Supplement: s1 [file s1]

# Encapsulated Plant-Derived Antimicrobial Reduces Enteric Bacterial Pathogens on Melon Surfaces During Differing Contamination and Sanitization Treatment Scenarios

## Supplemental Data

Table S1. Water contact angle ( $\theta$ ) for cantaloupe and spinach surfaces.

| Sample    | $\theta$ (°) | Mean±Std. Dev. |
|-----------|--------------|----------------|
| Spinach A | 86.26        | 81.31±7.00     |
| Spinach B | 76.36        |                |
| Melon A   | 77.10        | 70.38±9.51     |
| Melon B   | 63.65        |                |

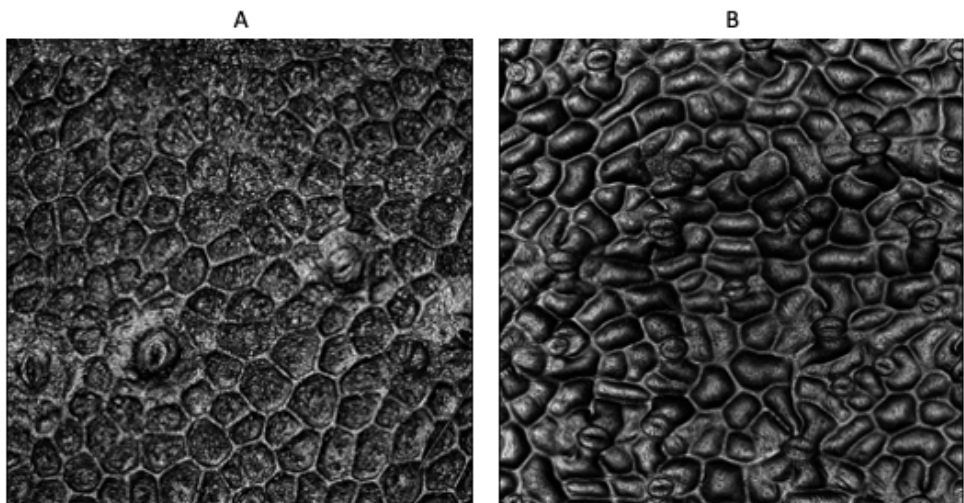

Figure S1. Laser confocal microscopy images of cantaloupe melon rind (A) and spinach leaf (B) surfaces not subjected to pathogen inoculation or sanitization. Images are 366  $\mu\text{m}$   $\times$  366  $\mu\text{m}$  in size.
